# Supplementary material for: miR-22 gene therapy treats HCC by promoting anti-tumor immunity and enhancing metabolism
Source: PubMed Central journal article supplement (PMC10277895; doi:10.1016/j.ymthe.2023.04.019), 2023-05-04
Supplement: mmc1.pdf [file mmc1.pdf]

**YMTHE, Volume 31**

**Supplemental Information**

**miR-22 gene therapy treats HCC  
by promoting anti-tumor immunity  
and enhancing metabolism**

**Ying Hu, Tahereh Setayesh, Farzam Vaziri, Xuesong Wu, Samuel T. Hwang, Xin Chen, and Yu-Jui Yvonne Wan**

**Table S1. Antibodies used for IHC, Western blot, ChIP, or flow cytometry.**

| <b>Name</b>                         | <b>Citation</b> | <b>Supplier</b>           | <b>Cat no.</b> | <b>Clone no.</b> |
|-------------------------------------|-----------------|---------------------------|----------------|------------------|
| IL6R $\alpha$                       | 28              | Santa Cruz Biotechnology  | sc-660         |                  |
| Phospho-Stat3 (Tyr705)              | 1236            | Cell Signaling Technology | #9131          |                  |
| Stat3 (124H6) Mouse mAb             | 1338            | Cell Signaling Technology | #9139          | 124H6            |
| IL17A                               | 20              | Invitrogen eBioscience    | 14-7175-81     | eBio17CK15A5     |
| HIF1 $\alpha$                       | 862             | Novus Biologicals         | NB100-105      | H1alpha67        |
| $\beta$ -ACTIN                      | 3568            | MilliporeSigma            | A1978          |                  |
| Ki-67                               | 264             | NeoMarkers                | RB-1510-P      |                  |
| CD45-PE/Cy7                         | 144             | Biolegend                 | 103114         | 30-F11           |
| CD3-BuV395                          | 30              | BD Biosciences            | 563565         | 145-2C11         |
| CD4-BV605                           | 17              | BD Biosciences            | 563151         | RM4-5            |
| CD8-Alexa700                        | 27              | BD Biosciences            | 557959         | 53-6.7           |
| CD44-BV711                          | 9               | BD Biosciences            | 563971         | IM7              |
| CD62L-Alexa647                      | 8               | Biolegend                 | 104421         | MEL-14           |
| CD25-PE                             | 290             | Invitrogen eBioscience    | 12-0251-82     | PC61.5           |
| FoxP3-FITC                          | 376             | Invitrogen eBioscience    | 11-5773-82     | FJK-16s          |
| IL17A-PECF594                       | 6               | BD Biosciences            | 562542         | TC11-18H10       |
| CD107a-BV711                        | 0               | BD Biosciences            | 564348         | 1D4B             |
| CD45-PE                             | 125             | Biolegend                 | 103106         | 30-F11           |
| CD3-PerCP Cy5.5                     | 67              | BD Biosciences            | 551163         | 145-2C11         |
| CD8-FITC                            | 32              | Invitrogen                | MA5-17597      | CT-CD8a          |
| CD4-APC                             | 161             | Biolegend                 | 100412         | GK1.5            |
| InVivoMAb anti-mouse CD8 $\alpha$   | 80              | Bio X Cell                | BE0004-1       | 53-6.7           |
| InVivoMAb rat IgG2a isotype control | 367             | Bio X Cell                | BE0089         |                  |
| IFN $\gamma$ -PE                    | 2               | BD Biosciences            | 612769         | XMG1.2           |
| CD3-APC                             | 132             | BD Biosciences            | 553066         | 145-2C11         |
| ROR $\gamma$                        | 129             | Invitrogen eBioscience    | 12-6988-82     | AFKJS-9          |
| Normal Mouse IgG                    | 329             | MilliporeSigma            | 13-371         |                  |
| Normal Rabbit IgG                   | 641             | MilliporeSigma            | 12-370         |                  |
| RNA Polymerase II                   | 195             | MilliporeSigma            | 05-623         | CTD4H8           |

**Table S2. Primer sequences.**

| Primers                  | Sequence                           |                                   |
|--------------------------|------------------------------------|-----------------------------------|
| Primers used for qRT-PCR |                                    |                                   |
| <i>Afp</i>               | F 5'-CAGTGCGTGACGGAGAAGAA -3'      | R 5'-AAACACCCATCGCCAGAGTT-3'      |
| <i>Cd133</i>             | F 5'-TGATTCCAAGGAGATTGCCCT-3'      | R 5'-GCAGCAACGGCACATACAAA-3'      |
| <i>Ccna2</i>             | F 5'-ACAGAGCTGGCCTGAGTCAT-3'       | R 5'-TTGACTGTTGGGCATGTTGT-3'      |
| <i>Gpc3</i>              | F 5'-AATCAACTGCGCTTCCTTGC-3'       | R 5'-AGGTGGTGATCTCGTTGTCC-3'      |
| <i>Alb</i>               | F 5'-TACAGCGGAGCAACTGAAGA-3'       | R 5'-TTGCAGCACAGAGACAAGAA-3'      |
| <i>Cyp3a11</i>           | F 5'-TCACAGACCCAGAGACGATTAAGA-3'   | R 5'-CCCGCCGGTTTGTGAAG-3'         |
| <i>Cd3e</i>              | F 5'- TCTCGGAAGTCGAGGACAGT3'       | R 5'-ATCAGCAAGCCCAGAGTGAT-3'      |
| <i>Cd4</i>               | F 5'- ACACACCTGTGCAAGAAGCA-3'      | R 5'-GCTCTTGTGGTTGGGAATC-3'       |
| <i>Cd8a</i>              | F 5'-CTCACCTGTGCACCCTACC-3'        | R 5'-ATCCGGTCCCCTTCACTG-3'        |
| <i>Il17a</i>             | F 5'-TTTAACTCCCTTGGCGCAAAA-3'      | R 5'-CTTTCCTCCGCATTGACAC-3'       |
| <i>Il17f</i>             | F 5'-CTGGAGGATAAACTGTGAGAGT-3'     | R 5'-TGCTGAATGGCGACGGAGTTC-3'     |
| <i>Rorc</i>              | F 5'-TCCCGAGATGCTGTCAAGTT-3'       | R 5'-ACTTGTTCTGTGTGCTGCTG-3'      |
| <i>Ccl20</i>             | F 5'-ACTGTTGCCTCTCGTACATACA-3'     | R 5'-ACCCACAATAGCTCTGGAAGG-3'     |
| <i>Ccr6</i>              | F 5'-GTCACCTGTGCTTACTTGAATG-3'     | R 5'-CTTAGGACTGGAGCCTGGATA-3'     |
| <i>Il6</i>               | F 5'-GTTGCCTTCTTGGGACTGATG-3'      | R 5'-GGGAGTGGTATCCTCTGTGAAGTCT-3' |
| <i>Il6ra</i>             | F 5'-ACAGTGTGGGAAGCAAGTCC-3'       | R 5'-TCGGTATCGAAGCTGGAAGT-3'      |
| <i>Il23a</i>             | F 5'-TGAAGATGTCAGAGTCAAGCAG-3'     | R 5'-ACAAGGACTCAAGGACAACAG-3'     |
| <i>Il23r</i>             | F 5'-AAGGCTTTTCGGAACCTCAT-3'       | R 5'-TTCCAGGTGCATGTCATGTT-3'      |
| <i>Il22</i>              | F 5'-TTGAGGTGTCCAACCTTCCAGCA -3'   | R 5'-AGCCGGACGTCTGTGTTGTTA-3'     |
| <i>S100a8</i>            | F 5'-TGTCCTCAGTTTGTGCAGAATATAAA-3' | R 5'-TCACCATCGCAAGGAACTCC-3'      |
| <i>S100A9</i>            | F 5'-GGTGAAGCACAGTTGGCA-3'         | R 5'-GTGTCCAGGTCCTCCATGATG-3'     |
| <i>Hif1a</i>             | F 5'-TCATCCATGTGACCATGAGG-3'       | R 5'-AAAAAGCTCCGCTGTGTGTT-3'      |
| <i>Tgfb1</i>             | F 5'- GCCTGAGTGGCTGTCTTTTGACG-3'   | R 5'-ACTTCCAACCCAGGTCCTTC-3'      |
| <i>Foxp3</i>             | F 5'-TCCTTCCAGAGTTCTTCCA-3'        | R 5'-CGAACATGCGAGTAAACCAA -3'     |
| <i>Il2ra</i>             | F 5'-AACGGCACCATCCTAAACTG-3'       | R 5'-CTGTGTTGGCTTCTGCATGT-3'      |
| <i>Il2</i>               | F 5'-AGGAACCTGAAACTCCCCAG-3'       | R 5'- AAATCCAGAACATGCCGCAG-3'     |
| <i>Nt5e</i>              | F 5'-AGGTTGTGGGGATTGTTGGA-3'       | R 5'-CCCCAGGGCGATGATCTTAT-3'      |
| <i>Lag3</i>              | F 5'-CCTCGATGATTGCTAGTCCCT-3'      | R 5'-GTAGACAGGCACTCGGTTCTG-3'     |
| <i>Nrp1</i>              | F 5'-AATGTTCTGTCGCTATGACCGGCT-3'   | R 5'-TTCTGCCACAATAACGCCCAATG-3'   |
| <i>Ctla4</i>             | F 5'-CATGTACCCACCGCCATACT-3'       | R 5'-CCAAGCTAACTGCGACAAGG-3'      |
| <i>Il10</i>              | F 5'-GGAGCAGGTGAAGAGTGATTTTAATA-3' | R 5'-TGCAGTTGATGAAGATGTCAAATTC-3' |
| <i>Il12a</i>             | F 5'-TGATGATGACCCTGTGCCTT-3'       | R 5'-CGCAGAGTCTCGCCATTATG-3'      |
| <i>Il35b</i>             | F 5'-GATCCACGTCCTTCATTGCC-3'       | R 5'-TGATTCGCTCAGCCACAAAG-3'      |
| <i>Runx1</i>             | F 5'-AGCGAGATTCAACGACCTCA-3'       | R 5'-GCCGTCCACTGTGATTTTGA-3'      |
| <i>Itga4</i>             | F 5'-GCCTGGAGGAGAGGGATAAC-3'       | R 5'-CAGAAGGCATGACGTAGCAA-3'      |
| <i>Itgb7</i>             | F 5'-CTACGACTCTGGGCTCTTGG-3'       | R 5'-ACAGGTCAGCCTCAGAGCAT-3'      |
| <i>CCr9</i>              | F 5'-CTTGCCACTCTTCCCTTCTG-3'       | R 5'-GCCTTCATGGCCTGTACAAT-3'      |
| <i>Ccl25</i>             | F 5'-CCAAGGTGCCTTTGAAGACT-3'       | R 5'-TCCTCCAGCTGGTGGTTACT-3'      |
| <i>Madcam1</i>           | F 5'-GCATGGTGACCTGGCAGTGAAG-3'     | R 5'-GGCAGCAGTATCCTCTCTGTAC-3'    |

|                                                                                     |                                    |                                  |
|-------------------------------------------------------------------------------------|------------------------------------|----------------------------------|
| <i>Ifih1</i>                                                                        | F 5'-GGAAACAGCGGGAATGAGTC-3'       | R 5'-AGCAGGCAGAAGACACTCAT-3'     |
| <i>Dhx58</i>                                                                        | F 5'-GTAGACAGAGGCAAGGTGGT-3'       | R 5'-TACAGATGAGCAGGTCTGG-3'      |
| <i>Rarb</i>                                                                         | F 5'-GCACTGACGCCATAGTGGTA-3'       | R 5'-CACCATCTCCACTTCCTCCT-3'     |
| <i>Cyp26a1</i>                                                                      | F 5'-GCACAAGCAGCGAAAGAAGGTGAT-3'   | R 5'-ACTGCTCCAGACAAGTCTGACTT-3'  |
| <i>Cyp26b1</i>                                                                      | F 5'-CGGAGAGACTGGTCACTGGT-3'       | R 5'-CGCCCCAGTAAGTGTGTCTT-3'     |
| <i>Gapdh</i>                                                                        | F 5'-TGTGTCCGTCGTGGATCTGA-3'       | R 5'-CCTGCTTCACCACCTTCTTGA-3'    |
| <i>18s</i>                                                                          | F 5'-CCGAAGCGTTTTACTTTGAAAAA-3'    | R 5'-TTCATTATTCCTAGCTGCGGTATC-3' |
| <i>miR-22</i>                                                                       | F 5'-CGCGAAGCTGCCAGTTGAAG-3'       | R 5'-GTGCAGGGTCCGAGGT-3'         |
| <i>U6</i>                                                                           | F 5'-CTCGCTTCGGCAGCACA-3'          | R 5'-AACGCTTCACGAATTTGCGT-3'     |
| Primers used for ChIP-qPCR                                                          |                                    |                                  |
| ROR $\gamma$ t_P1 (-4149 to -4208)<br>HIF1 $\alpha$ - ChIP                          | F 5'-CACCTCCAGGTTGTTTGCCCC-3'      | R 5'-GAGTGTGCATGTCTGTGGAGG-3'    |
| ROR $\gamma$ t_P2 (-6988 to -7002)<br>HIF1 $\alpha$ - ChIP                          | F 5'-GCGAAGGGACAGCTGCCTGC-3'       | R 5'-CTCCAGCTGGTAAACAGCAG-3'     |
| ROR $\gamma$ t_P3 (non-HIF1 binding)<br>HIF1 $\alpha$ - ChIP                        | F 5'-CAATCCTCCGTGCTGACAGCA-3'      | R 5'-CTGTCTAAGGGCGAAGGTCA-3'     |
| IL17A_P1 (-4739 to -4755)<br>p-STAT3-ChIP                                           | F 5'- CAGGTATTATTCTCAGGGCTTTGG -3' | R 5'- TGGCAATGGTGTCTTTTCTTTG -3' |
| IL17A_P2 (-19 to -32)<br>p-STAT3-ChIP                                               | F 5'- CACCTCACACGAGGCACAAG-3'      | R 5'- ATGTTTGCGCGTCCTGATC-3'     |
| IL-17A_P3 (-2913 to -2925)<br>ROR $\gamma$ t or HIF1 $\alpha$ - ChIP                | F 5'- GGCTACAACATAGTCATACAC-3'     | R 5'- GAAGGTATCAGATCCCATTAC-3'   |
| IL-17A_P4 (-6128 to -6140)<br>ROR $\gamma$ t or HIF1 $\alpha$ - ChIP                | F 5'- CAGATGCATGCAGAACTGAC-3'      | R 5'- AGGCTCTGGAGAGCAGACA-3'     |
| IL-17A_P5 (non- ROR $\gamma$ t/P-STAT3) binding)<br>ROR $\gamma$ t or p-STAT3- ChIP | F 5'- AGTCTGGCCCCTACACACAC-3'      | R 5'- ATGGGGGACTTTTGGGATAG-3'    |

**Table S3.** Mouse HCC scoring.

| Score | Features                            |                                                                                                   |                               |                                      |                                |
|-------|-------------------------------------|---------------------------------------------------------------------------------------------------|-------------------------------|--------------------------------------|--------------------------------|
|       | Centrilobular vacuolar degeneration | Foci of proliferation                                                                             | Mitotic rate                  | Scirrhous type foci of proliferation | Inflammatory cell infiltration |
| 1     | <10% of lobules                     | Small with vacuolated cells (<1 focus / 10X HPF <sup>1</sup> )                                    | <1 / 40X HPF <sup>1</sup>     | 1 or 2 / 10X HPF <sup>1</sup>        | <1 / 20x HPF <sup>1</sup>      |
| 2     | 10~33% of lobules                   | Moderate-sized, multifocal, with small non-vacuolated cells (1 to 2 foci / 10X HPF <sup>1</sup> ) | 1 to 3 / 40X HPF <sup>1</sup> | 3 to 6 / 10X HPF <sup>1</sup>        | 1 to 2 / 20x HPF <sup>1</sup>  |
| 3     | 33~66% of lobules                   | Moderate-sized and coalescing or large, multifocal (2 to 3 foci / 10X HPF <sup>1</sup> )          | 4 to 6 / 40X HPF <sup>1</sup> | 7 to 10 / 10X HPF <sup>1</sup>       | 2 to 3 / 20x HPF <sup>1</sup>  |
| 4     | >66% of lobules                     | large and coalescing) >3 foci / 10X HPF <sup>1</sup>                                              | >6 / 40X HPF <sup>1</sup>     | >10 / 10X HPF <sup>1</sup>           | >3 / 20x HPF <sup>1</sup>      |

<sup>1</sup> HPF: high-power field.

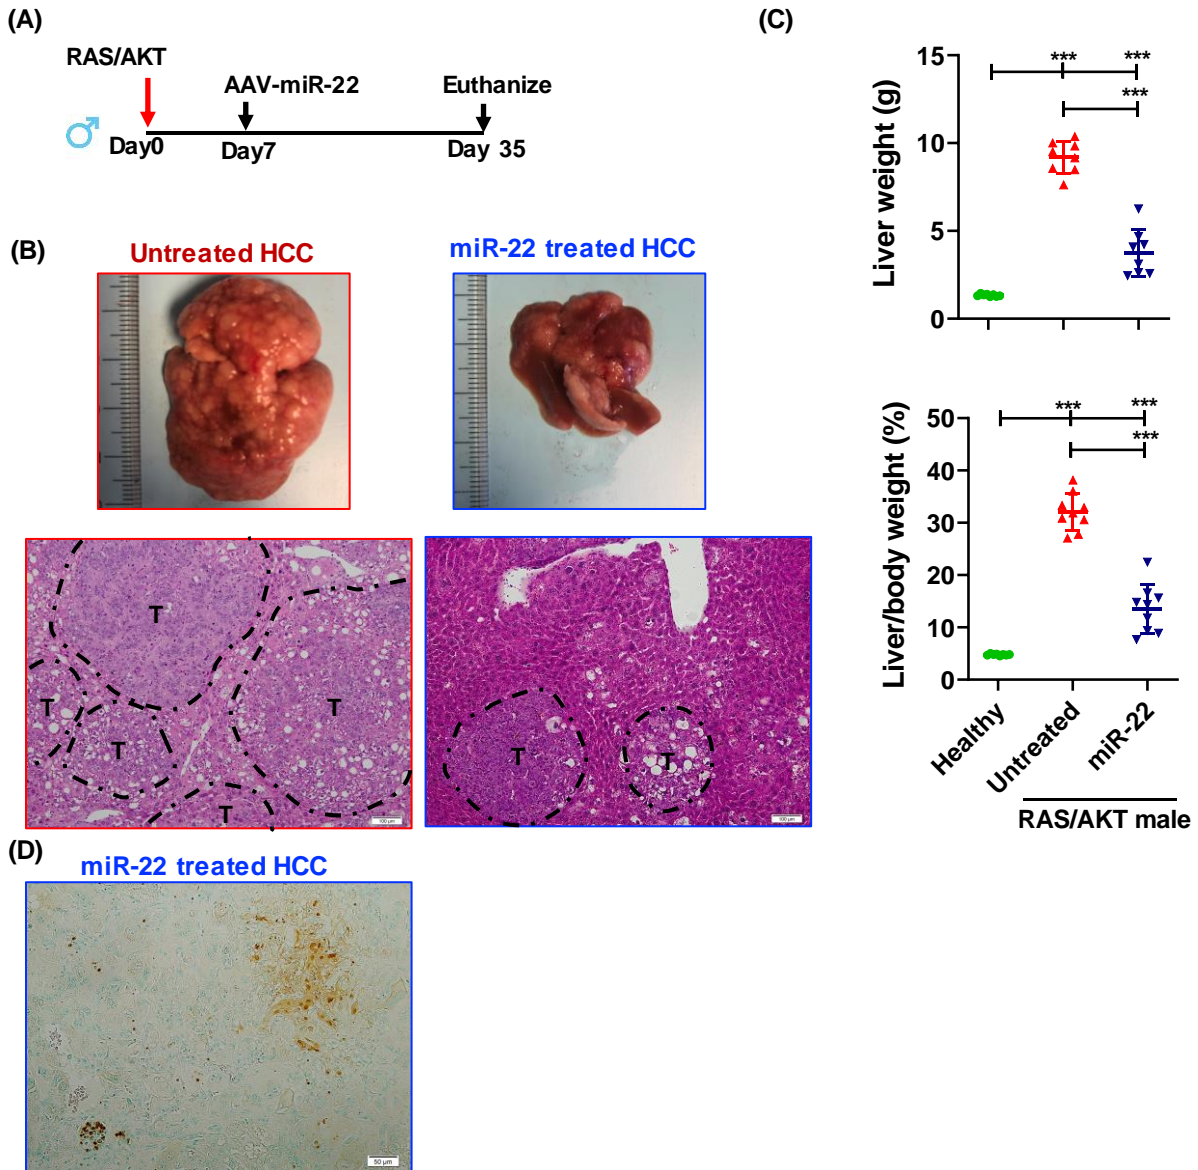

**Figure S1. miR-22 treats HCC in male mice.** (A) Study design for miR-22 treatment in RAS/AKT-induced HCC model, (B) Representative liver morphology and H&E-stained liver sections (10X), (C) Liver weight and L/B ratio for the studied groups. (D) Apoptosis detected by TUNEL staining was found in miR-22-treated HCC female mice as one example (20X).

## Hepatocyte markers

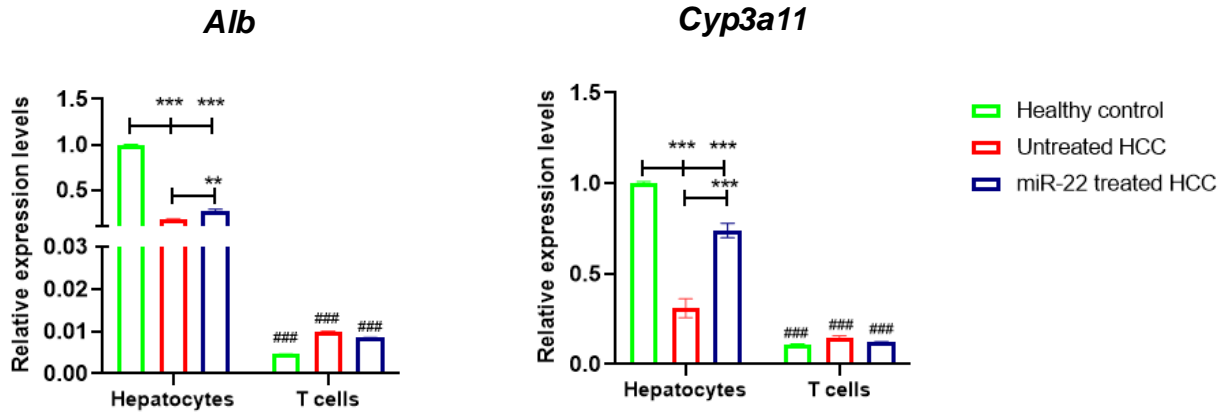

## T cells markers

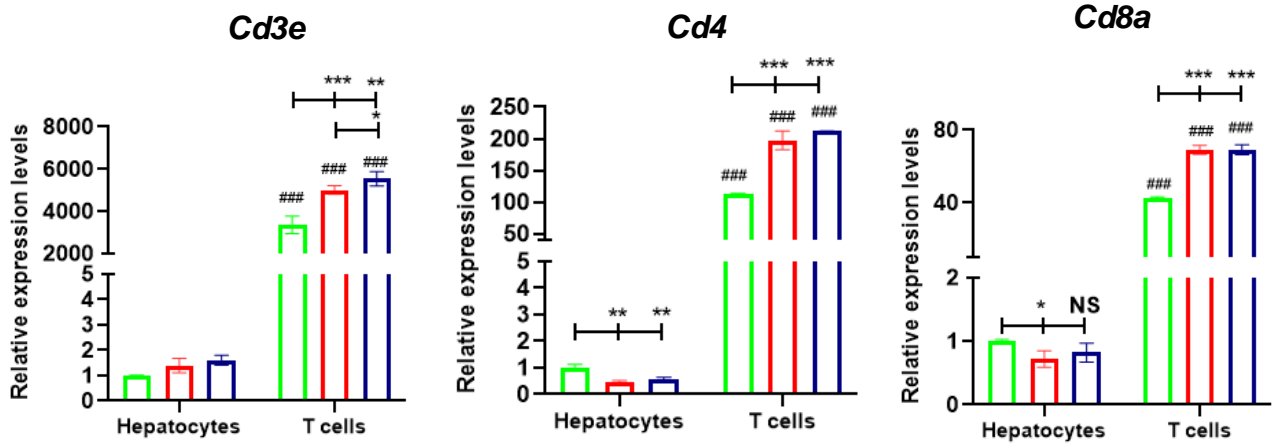

**Figure S2. The expression levels of hepatocyte and T cell markers in isolated hepatocytes and T cells.** Hepatocytes and T cells isolated from livers of healthy, untreated HCC, and miR-22-treated HCC mice were subjected to RNA extraction followed by qRT-PCR. Data = mean  $\pm$  SD (n=3). \*  $p < 0.05$ , \*\*  $p < 0.01$ , \*\*\*  $p < 0.001$  by One-way ANOVA. # Comparison between hepatocytes and T cells by unpaired two-tailed Student's t test.

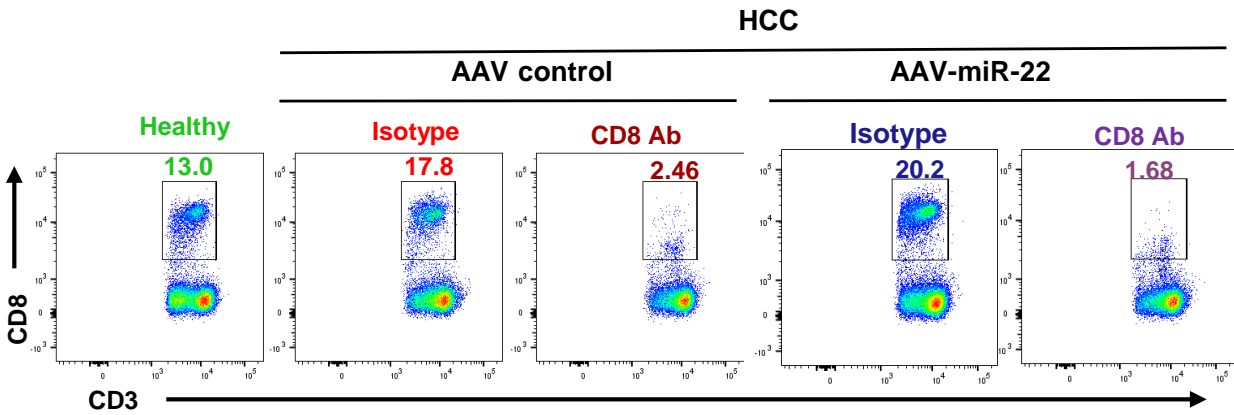

**Figure S3. CD8 antibody blockade depletes hepatic CD8<sup>+</sup> T cells in HCC mice.** Representative flow cytometry plots of CD3<sup>+</sup>/CD8<sup>+</sup> T cells in the livers of healthy, AAV8 control and AAV8-miR-22-treated HCC mice followed by either anti-CD8 mAb or isotype control (n = 4).



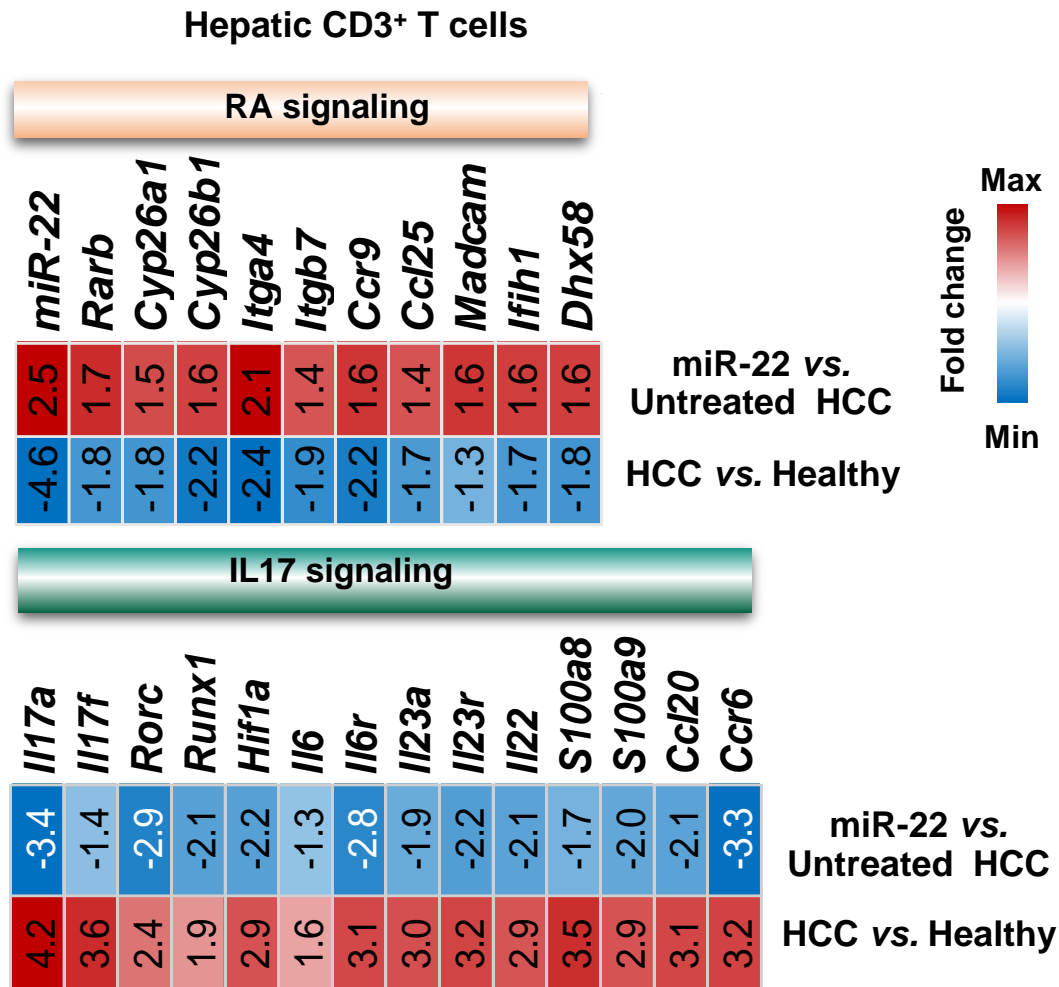

**Figure S4. miR-22 increases RA signaling and inhibits IL17 signaling in  $\beta$ -catenin/AKT-driven HCC mice.** (A) The fold changes of RA and IL17 signaling-related genes in hepatic T cells were quantified by qRT-PCR and shown in the heatmap. Hepatic T cells isolated from three mice for each group were subjected to RNA extraction followed by qRT-PCR.

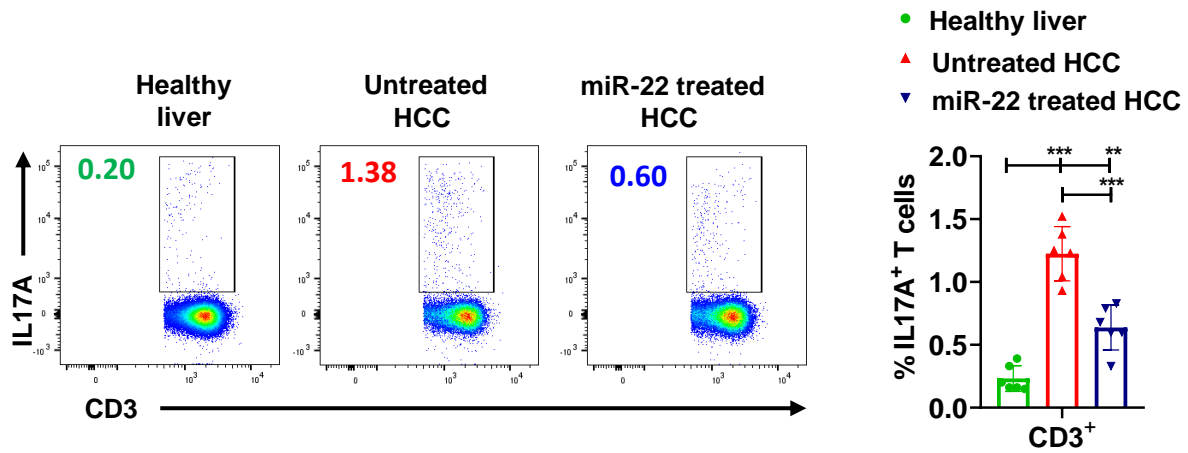

**Figure S5. miR-22 treatment reduces IL17-producing T cells.** Representative flow cytometry plots and percentage of IL17-producing T cells (CD3<sup>+</sup>IL17A<sup>+</sup>) in the livers of healthy, HCC, and miR-22-treated HCC mice. Data = mean  $\pm$  SD. \*\* p<0.01, \*\*\* p<0.001 (n = 6 for each group).

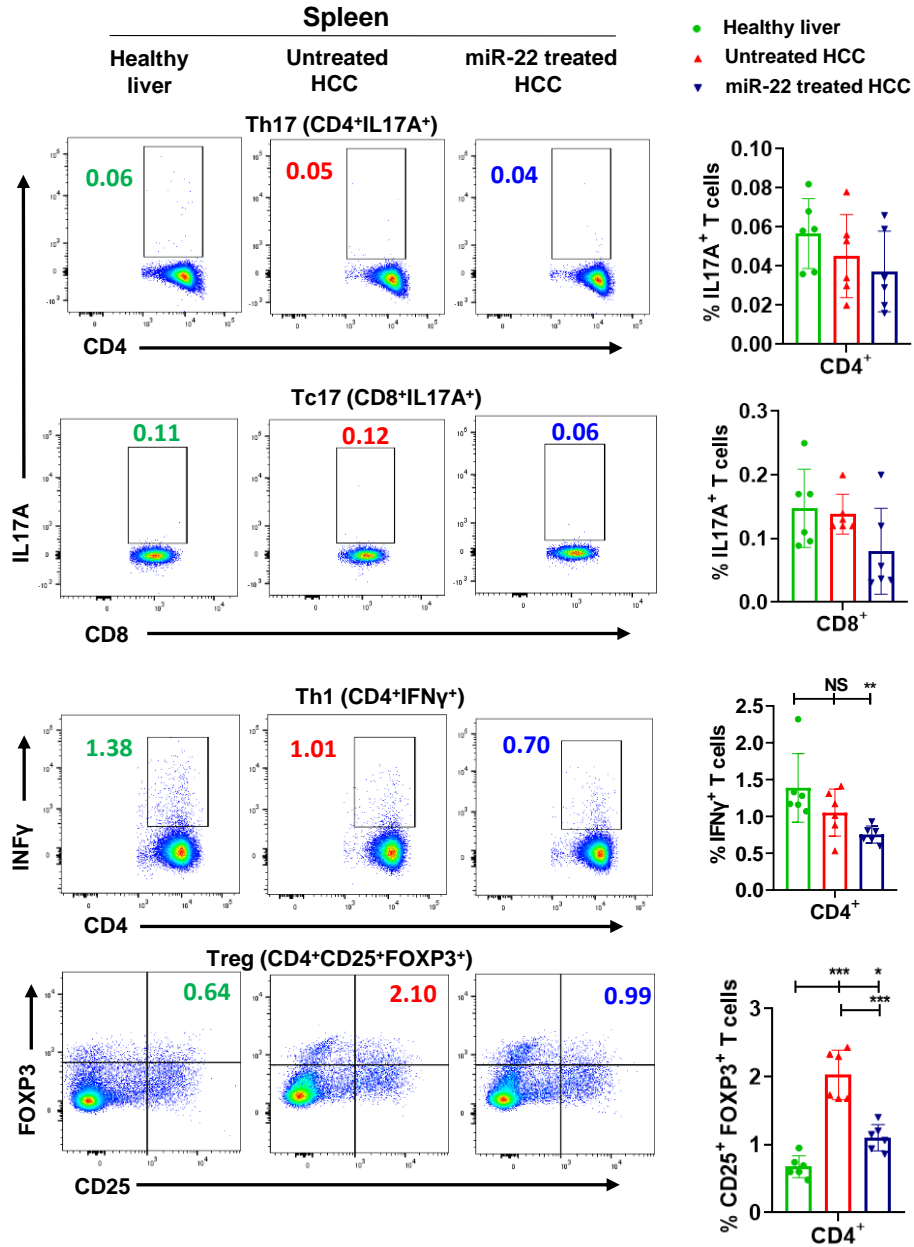

**Figure S6. miR-22 treatment reduced Treg and Th1 cells but had no effect on Th17 and Tc17 cells in the HCC splenocytes.** Representative flow cytometry plots and percentages of Th17 (CD4<sup>+</sup>IL17A<sup>+</sup>), Tc17 (CD8<sup>+</sup>IL17A<sup>+</sup>), Th1 (CD4<sup>+</sup>IFN $\gamma$ <sup>+</sup>), and Treg (CD4<sup>+</sup>CD25<sup>+</sup>FOXP3<sup>+</sup>) T cells from the splenocytes isolated from healthy, untreated HCC, and miR-22-treated HCC mice. Data = mean  $\pm$  SD. \*  $p < 0.05$ , \*\*  $p < 0.01$ , \*\*\*  $p < 0.001$  by One-way ANOVA (n = 6).

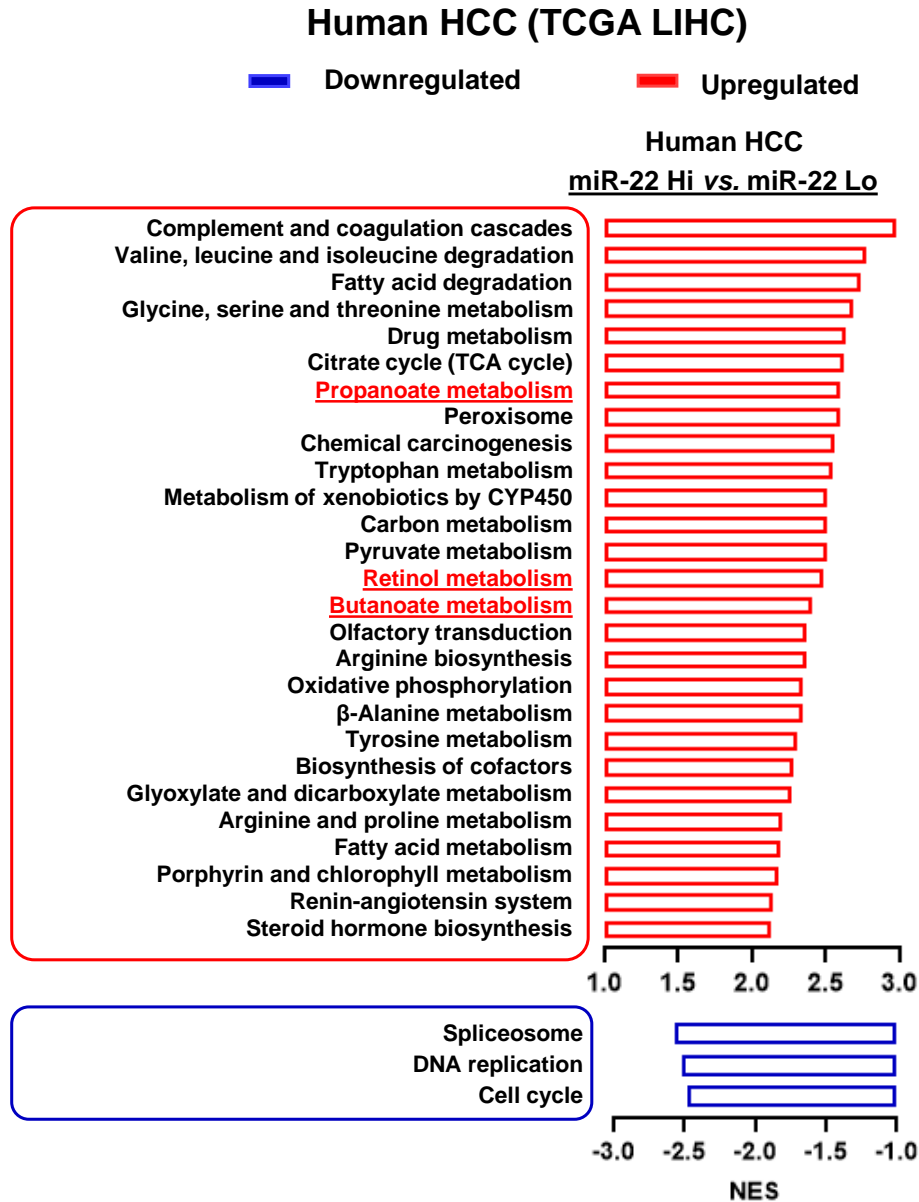

**Figure S7. Pathway analysis for the TCGA LIHC human transcriptome profiling based on miR-22 expression levels.** Pathways enriched in human HCC by comparing miR-22 high (miR-22 Hi, n=89) vs. miR-22 low (miR-22 Lo, n=92) HCC revealed by GSEA based on KEGG gene set. miR-22 inducer signaling (Retinol, Propanoate, and Butanoate metabolism) was underlined and highlighted in red (Upregulated). Normalized Enrichment Score (NES).
